# Supplementary material for: Unity in Diversity - Food Plants and Fungi of Sakartvelo (Republic of Georgia), Caucasus
Source: Research Square preprint supplement (doi:10.21203/rs.3.rs-753320/v1), 2021-08-04
Supplement: Supplementary file 1 [file cb6a1887de367bea522a40a4.docx]

**Appendix Table 1**. All Food plant species encountered in Georgia

| **Family / Scientific name** | **Georgian Name** | **Use description** | **Part used** | **Location** |
| --- | --- | --- | --- | --- |
| **Actinidiaceae** |  |  |  |  |
| Actinidia callosa Lindl. | კივი (k'ivi), აქტინიდია (akt'inidia) | Human food; Human Food - Alcohol, Human Food - Jam; Human Food - Phkhali | Fruit; Leaves | Garden |
| **Adoxaceae** |  |  |  |  |
| Sambucus ebulus L. | ანწლი (ants’li), ანწილი (ants'ili); ღენღი (genghi Svan.), გენჭვ (gentchv Svan.) | Human food, Human Food - Alcohol, Human Food - Jam; Human Food - Phkhali | Fruit; Leaves | Forest, Garden |
| Sambucus nigra L. | დიდგულა (didgula), თხიფსელა (tkhipsela); თოფილაი (thophilai Svan.) | Human food, Human Food - Jam, Human Food - Alcohol | Fruit | Forest |
| Viburnum lantana L. | უზანი (uzani); თურსა (tursa Tush.), წონწოფ (tzontzoph Svan.), ალუდა (aluda Khev.), ჭიჩულა (urdzani Khev.), ჭიჩულა (t'sirchua Khev.) | Human food | Fruit | Forest, Garden |
| Viburnum opulus L. | ძახველი (dzakhveli); წონწოფ (tzontzoph Svan.), სანწეფი (santzeph Svan.), წანწოფი (ts'ants'ofi Svan.), ალუდა (aluda Khev.) | Human food, Human Food - Alcohol, Human Food - Tea | Fruit | Forest |
| **Agaricaceae** |  |  |  |  |
| Agaricus arvensis Schaeff. | ქამა (kama), ქოქოდილ (kokodil) | Human food | Fruiting body | Forest, Garden |
| Agaricus campestris L. | მინდვრის სოკო (mindvris sok'o) | Human food | Fruiting body | Forest |
| Agaricus tabularis Peck | ცხვარიო (tskhvario) | Human food | Fruiting body | Forest |
| Bovista sp. | ყვავთკუსა (q'vavtkusa), ფიჭვნარა (pich'vnara) | Human food | Fruiting body | Forest |
| Bovista sp. / Lycoperdon sp. | გუდაფშუტა (gudapshut'a) | Human food | Fruiting body | Forest |
| Clavatia gigantea (Batsch) Rostk. | ცვარიო (tsvario), ფურფაშა (purpasha) | Human food | Fruiting body | Forest |
| Coprinus comatus (O.F. Müll.) Pers. | მერცხალა (mertskhala), გველის სოკო (gvelis soko) | Human food | Fruiting body | Forest |
| Lycoperdon perlatum Pers. / Lycoperdon pyriforme Schaeff. | მალათუ (malathu) | Human food | Fruiting body | Forest |
| Macrolepiota procera (Scop.) Springer | წერეწო (ts'erets'o) | Human food | Fruiting body | Forest |
| **Amanitaceae** |  |  |  |  |
| Amanita caesarea (Scop.) Pers. | ნიყვი (niq'vi), წითელქუდა (tzithelquda) | Human food | Fruiting body | Forest |
| Amanita muscaria (L.) Lam. | წითელი შხამასოკო (tsiteli shkhamasok'o) | Human food | Fruiting body | Forest |
| **Amaranthaceae** |  |  |  |  |
| Amaranthus palmeri S. Watson | ჯიჯილაყი (jijilaqhi) | Human Food - Phkhali | Leaves | Garden, Forest |
| Amaranthus paniculatus L. | წითელი ჯიჯლაყა (ts'iteli jijlaq'a) | Human Food - Phkhali | Leaves | Forest |
| Amaranthus paniculatus L. | წითელი ჯიჯლაყა (ts'iteli jijlaq'a), თათრულა ფხალი (tatrula pkhali) | Human Food - Phkhali | Leaves, stem | Forest |
| Amaranthus retroflexus L. | ჯიჯლაყა (jijlaq'a), ჭიჭლაყა (ch'ich'laq'a), რუხვფერია (rukhvperia), წითელი ფხალი (ts'iteli pkhali), ლიხანა ფხალი (likhana pkhali), ჩვეულებრივი ჯიჯლაყა (chveulebrivi jijlaq'a), თვითმავალა (tvitmavala), წოწნარა ფხალი (ts'ots'nara pkhali), წოწნარა (ts'ots'nara), მხალი-ბალახი (mkhali balakji), თეთრი მხალი (tetri mkhali) | Human Food - Phkhali; Human Food - Khachapuri | Leaves, stem, Stem | Forest, Garden |
| Amaranthus speciosus L. | ჯიჯლაყა-ყვავილი (jijlaq'a-q'vavili); ლერტაგიჭი (lertagich'I Ossetian) | Human Food - Phkhali | Leaves | Garden |
| Amaranthus spinosus L. | ჯიჯლაყა-ყვავილი (jijlaq'a-q'vavili) | Human Food | Stem | Garden |
| Atriplex hortensis L. | წითელი მხალი (ts'iteli pkhali); თათაბო (tatabo Tush.) | Human Food - Phkhali | Leaves | Forest |
| Beta vulgaris L. | ჭარხალი (ch'arkhali), წიტელი ჭარხალი (tsiteli ch'arkhali), შავი ფხალი (shavi phkhali); ხოლჰნუტა (kholnuta Khev.); (sokla Arm.) | Human food, Human Food - Pickled; Human Food - Phkhali | Root; Leaves | Garden |
| Beta vulgaris L. ssp. cicla (L.) Moq. | მანგოლდი (mangoldi), ფოთლოვანი ჭარხალი (phothlovani charkhali), ჭარხალი (ch'arkhali), წითელი ფხალი (ts'iteli pkhali), სოტოლია (sot'olia) | Human Food - Phkhali | Leaves | Garden |
| Beta vulgaris L. ssp. esculenta (Salisb.) Gürke var. altissima Rössig. = Beta vulgaris saccharifera Alef. | შაქრის ჭარხალი (shakris ch'arkhali); ხულ (khul Svan.) | Human food; Human Food - Pickled | Root; Leaves | Garden |
| Chenopodium album L. | ნაცარქათამა (natsarqathama), მხალი (mkhali), ჯუმურია (jumuria), ქათამნაცარა (katam,natsara); ქათანაცარა (qathanatsara Svan.), მესგვლა (mesgvla Svan.), მესგვლა (menshkva Svan.), ფუტაყ (futaq' Ossetian) | Human Food - Phkhali; Human Food - Khachapuri, Human Food - Mkhlovana | Leaves, stem | Garden, Forest |
| Chenopodium bonus-henricus L. | მხალი (mkhali) | Human Food - Phkhali | Leaves | Garden |
| Chenopodium foliosum (Moench) Asch. | მათუთა (matula, ნაცარქათამა (natsarkatama); ძაღლთჟოლა (dzaghltzhola Tush.) | Human Food - Phkhali | Leaves, stem, seeds | Forest |
| Chenopodium sp. | ნაცარქათამა (tsatsarkatama Khev.) | Human Food - Pickled | Stem | Forest |
| Spinaca oleracea L. | ისპანახი (isp'anakhi), ნაცარქათამა (natsarkatama) | Human Food - Phkhali, Human Food - Pickled | Leaves, stem | Garden |
| **Amaryllidaceae** |  |  |  |  |
| Alium sp. | ყანის ნიორი (q'anis niori), კატაპრასი (k'atap'rasi) | Human Food - Pickled | Bulb | Garden |
| Allium apeloprasum L. | პრასი (prasi); პრასა (prasa Svan.) | Human Food - Phkhali | Leaves, stem, whole plant | Garden |
| Allium ascalonicum L. | სოხვი (sokhvi) | Human food | Stem | Garden |
| Allium atroviolaceum Boiss | ყანის ნიორი (q'anis niori), კატაპრასი (k'atap'rasi) | Human Food - Pickled | Bulb | Garden |
| Allium cepa L. | ხახვი (khakhvi), ხვარხვი (khvarkhvi), შირაქულა (shirakula), ჩ’ლაყვა ხახვი (ch'lak'va khakhvi), ქ'ართ'ოპილა ხახვი (k'art'opila khakhvi) | Human food, Human Food - Spice; Human Food - Phkhali | Bulb, whole plant; Leaves | Garden |
| Allium fistulosum L. | ჭლაკვი (ch'lakvi), სოხვი (sokhvi), ჭყუბალა (ch'q'ubala); ჭაგვ (ch'hagv Svan.) | Human food; Human Food - Phkhali; Human Food - Pickled | Bulb, stem; Leaves; Whole plant | Garden |
| Allium kunthianum Vved. | კლდის ხახვი (k'ldis khakhvi), კლდისნიორა (k'ldisniora) | Human Food - Phkhali | Leaves | Forest |
| Allium ponticum Miscz. | ყანის ნიორი (q'anis niori), კატაპრასი (k'atap'rasi) | Human Food - Pickled | Bulb | Garden |
| Allium porrum L. | პრასი (p'rasi), იმერული პრასი (imeruli p'rasi), პრასა (p'rasa) | Human food, Human Food - Pickled; Human Food - Phkhali, Human Food - Spice | Bulb, stem, whole plant; Leaves | Garden |
| Allium rotundum L. | ყანის ნიორი (q'anis niori), ჭლაკვი (ch'lak'vi), სორხი (sorkhi), ღოღე სორხი (g'og'e sorkhi) | Human Food, Human Food - Phkhali; Human Food - Pickled, Human Food - Phkhali | Stem; Bulb | Garden |
| Allium sativum L. | ნიორი (niori), რუსულა ნიორი (rusula niori) | Human food; Human Food - Phkhali | Bulb, flowers; Leaves, whole plant | Garden |
| Allium sp. | ველური პრასა (veluri p'rasa ), ველური პრასა (veluri p'rasa ) | Human Food | Stem | Forest |
| Allium ursinum L. | ღანძილი (ghanzili), მთის ღანძილი (mtis ghandzili), ოლენა (olena), სობო (sobo); ნიხანძილ (nikhandzil Svan.) | Human Food - Phkhali; Human Food - Pickled | Leaves; Whole plant | Forest, Garden |
| Allium victorialis L. | ღანძილი (ghanzili), მთის ღანძილი (mtis ghandzili), ოლენა (olena), სობო (sobo), მთის ღანძილი (mtis ghanzili), (t'q'niora) ტყინიორა, ნიორა (niora), შყაჟვი ღვესუ (shq'azhvi g'vesu); ნიხანძილ (nikhandzil Svan.), შიშღილ (shishkil Svan.), შებუ (shebu Tush., Khev.), (Masundi Arm.) | Human Food - Pickled, Human Food - Phkhali | Leaves, stem, bulb, whole plant | Forest, Garden |
| Galanthus woronowii Losinsk. | ვორონოვის თეთრყვავილა (voronovis tetrq'vavila), ენძელა (endzela) | Human Food | Bulb | Forest |
| Narcissus sp. | ნარგიზი (nargizi), ნიორა მცენარე (niora mtsenare) | Human Food | Flower | Forest |
| **Annonaceae** |  |  |  |  |
| Annona cherimola Mill. | ანონა (anona) | Human food | Fruit | Garden |
| **Apiaceae** |  |  |  |  |
| Aethusa cynapium L. | მარიამძმარა (mariamdzmara) | Human Food - Phkhali | Leaves | Forest |
| Agasyllis latifolia (Bieb.) Boiss. | დუცი (dutsi); ლაგი (lagi Khev.); ღეჰ (gheh Svan.), ღეი (gei Svan.) | Human Food - Phkhali, Human Food - Pickled, Human Food - Chave, Human Food - Khachapuri | Stem, leaves, root | Forest |
| Anethum graveolens L. | კამა (k'ama), ცერეცო დიდი კამა (tseretso didi k'ama), ცერეცო (tseretso) | Human Food - Spice, Human Food - Svan salt; Human food | Leaves, seeds, stem; Whole plant | Garden |
| Angelica tatianae Bordz. | ანგელოზა (angeloza) | Human Food - Pickled | Stem | Forest |
| Anthriscus cerefolium (L.) Hoffm. | ჭყიმა-ფხალი (ch'q'ima-pkhali) | Human Food - Phkhali | Leaves, stem | Garden |
| Anthriscus nemorosus (M. Bieb.) Spreng. | მათუთი (matuti); ლიმი (limi Svan.) | Human Food - Pickled, Human food | Leaves, seeds, stem | Forest, Garden |
| Anthriscus sylvestris L. | ლიმი (limi), ჭყიმი (ch'q'imi), მაწარა (matsara), ღიმის დედა (g'imis deda); (Mandag Arm.) | Human Food - Pickled; Human Food - Phkhali | Stem; Leaves | Forest |
| Apium graveolens L. | ნიახური (niakhuri), დიდი ნიახური (didi niakhuri), სონა (sona) | Human food, Human Food - Pickled, Human Food - Spice; Human Food - Phkhali | Stem, root, leaves; Leaves | Garden |
| Carum carvi L. | ძირა (zira), კვლიავი (k'vilavi), კ'ვლიავა (k'vilapi); წყლის ქონდარი (ts’q’lis kondari Tush.), გიცრულ (gitsrul Svan.) | Human Food - Spice, Human Food - Svan salt, Human food, Human Food - Khinkali, Human Food - Chave, Human Food - Pickled | Seeds | Garden, Forest |
| Chaerophyllum aureum L. | ძენწკლია (dzents'k'lia), ყინტორა (q'int'ora), ხოზო (khozo); ყვასგ სვან (qhvasg Svan.), ჭიმი (ch'imi Tush.) | Human food - Pickled | Stem, root | Forest |
| Chaerophyllum bulbosum L. | ღიმი (g'imi), ატოლი (at'oli); ჭიმი (ch’imi Tush.) | Human Food - Pickled, Human Food - Phkhali, Human Food - Khachapuri | Leaves, stem, seeds | Forest |
| Chaerophyllum caucasicum (Fisch.) B. Schischk | ღიმი (g'imi), ატოლი (at'oli), ხიფხოლა (khipkhola); ჭიმი (ch’imi Tush.), (Shushan Arm.), (Pampara Arm.) | Human Food - Phkhali, Human Food - Khachapuri; Human Food - Pickled | Leaves, stem; Stem, root | Forest |
| Conium maculatum L. | მათუთი (matuti), კონიო (k'onio), მათუთა (matuta) | Human Food - Phkhali; Human Food - Pickled | Leaves; Stem | Forest |
| Coriandrum sativum L. | ქინძი (kindzi) | Human food, Human Food - Svan salt; Human Food - Phkhali; Human Food - Spice | Seeds; Leaves; Leaves, stem, dry seeds | Garden |
| Daucus carota L. ssp. sativus | სტაფილო (st'apilo), ფერისცვალა (peristsvala), სიქილონჯა (sikilonja), მარკოვი (markovi); (Markowa Arm.) | Human food; Human Food - Phkhali | Root; Leaves, whole plant | Garden |
| Falcaria sioides Asch. | კოფრჩხილა (k'oprchkhila), ბატიფეხა (bat'ipekha | Human Food - Phkhali, Human Food - Pickled | Leaves, stem | Forest |
| Foeniculum vulgare Mill. | ცერეცო (tseretso), დიდი კამა (didi k'ama), ოკრუპი (ok'rup'i), კამა (k'ama) | Human food; Human Food - Phkhali, Human Food - Svan salt, Human Food - Spice | Root, seeds, stem; Leaves | Garden |
| Heracleum asperum M. Bieb. | შუპყა (shupq’a) | Human Food - Pickled, Human Food - Sats'ebai; Human Food - Phkhali | Stem; Leaves | Forest |
| Heracleum leskovii Grossh. | შუპყა (shupq’a) | Human Food - Pickled | Stem | Forest |
| Heracleum sect. villosum | თეთრი დიყი (tetri diq'i), ლაგი (lagi) | Human Food - Pickled | Stem | Forest |
| Heracleum sosnowskyi Manden | დიყი (diq'i), ხევსურის დიყი (khevsuris diq'i), დიყინა (diq'ina); ქეხი (Qekhi Arm.) | Human Food - Pickled; Human Food - Phkhali, Human Food - Sats'ebai; Human Food - Chave | Leaves, stem, seeds; Leaves; Stem | Forest, Garden |
| Heracleum sp. | ლეშხი (leshkhi) | Human food - Pickled | Stem | Forest |
| Heracleum sp. | დიყი (diq'i) | Human Food - Phkhali | Leaves | Forest |
| Heracleum sp. | დიყი (diq'i); მდიყი (mdiq'i ), მდუსი (mdusi) | Human food - Pickled | Stem | Forest |
| Heracleum sp. | დიყი (diq'i), ჩიჩვლა (chichvla), ნანჩხოლ (nanchkhol | Human food - Pickled | Stem | Forest |
| Heracleum wilhelmsii Fisch. & Ave-Lall | დიყი (diq'i); ქეხი (Qekhi Arm.) | Human food - Pickled | Stem | Forest |
| Hippomarathrum crispum (Pers.) Boiss. | ქარქვეტა (Marts'q'vi), ბურბურა (burbura), ქარქვეტა (karkvet'a) | Human Food - Phkhali, Human Food - Pickled | Stem, leaves | Forest |
| Levisticum officinale W.D.J. Koch | ცისკარა (tsisk'ara), სასუქა (sasukua) | Human Food - Phkhali, Human Food - Chave, Human Food - Sats'ebai; Human Food - Pickled | Leaves; Stem, leaves | Forest, Garden |
| Ligusticum alatum Spreng. | მარიამა (mariamdzmara) | Human Food - Phkhali; Human Food - Sats'ebai | Leaves | Forest |
| Petroselinum crispum (Mill.) Fuss | ოხრახუში (okhrakushi), მაკიდო (mak'ido), მაღდანოზი (mag'danozi), მაკინდოლი (mak'indoli) | Human food; Human Food - Spice | Leaves, stem, whole plant; Leaves, seeds, stem | Garden |
| Xanthogalum purpurascens Avé-Lall. | ჯოჭი (joch'i), ქურქუნდელი (kurkundeli) | Human food | Stem | Forest |
| **Araceae** |  |  |  |  |
| Arum albispatum Stev. ex Ledeb. | ქალაკოდა (qalakoda Svan.) | Human Food - Phkhali | Leaves | Forest |
| Arum orientale M. Bieb. | ქალაკოდა (qalakoda Svan.) | Human Food - Phkhali | Leaves | Forest |
| Arum sp. | ნიუკა (niuk'a), დაჭრილა (dach'rila); ქალაკოდა (qalakoda Svan.) | Human Food - Phkhali; Human food | Leaves; Leaves, stem | Forest, Garden |
| **Araliaceae** |  |  |  |  |
| Aralia spinosa L. | არალია (aralia) | Human Food - Honey (Bees) | Flower | Garden |
| **Asparagaceae** |  |  |  |  |
| Asparagus officinalis L. | სატაცური (sat'atsuri) | Human Food; Human Food - Phkhali | Stem; Leaves, stem | Garden, Forest |
| Asparagus sp. | სატაცური (sat'atsuri) | Human food | Stem | Forest |
| Muscari sosnowskyi Schchian | ყაზახა (q'azakha) | Human Food | Stem | Forest |
| Ornithogalum woronowii Kasch | იმერული ძაღლნიორა (imeruli dzag'lniora) | Human Food | Bulb | Forest |
| Polygonatum glaberrimum C. Koch | სვინტრი (svint'ri), სკვანტილა (sk'vant'ila) | Human Food - Phkhali | Leaves | Forest |
| Ruscus colchicus Yeo | ძმერხლი (dzmerkhli) | Human Food | Stem | Forest |
| Ruscus hypophyllum L. | ძმერხლი (dzmerkhli) | Human food | Fruit | Forest |
| Scilla sp. | ცისთვალა (tsitsvala), ოლენა (olena) | Human Food | Stem | Forest |
| **Asteraceae** |  |  |  |  |
| Achillea grandiflora M. Bieb. | ჯორთკუდა (jortk’uda) | Human Food - Phkhali | Leaves | Forest |
| Achillea millefolium L. | ფარსმანდუკი (parsmanduk’i ) | Human Food - Tea; Human Food - Khachapuri | Whole plant; Leaves | Forest |
| Arctium lappa L. | ძირხვენა (dzirxvena), ოროვანდი (orovandi); (Graduk Arm.) | Human Food - Phkhali; Human food; Human Food - Pickled | Leaves; Root; Stem | Forest |
| Artemisia absinthium L. | აბზინდა (abzinda), ხმატურა (khmat'ura), მიწავაშლა (mits'avashla); გიეში (gieshi Tush.) | Human Food - Phkhali, Human Food - Tea | Leaves | Garden, Forest |
| Artemisia dracunculus L. | ტარხუნა (t’arkhuna) | Human Food - Phkhali; Human Food - Spice; Human food | Leaves; Leaves, root, seeds, stem | Garden |
| Artemisia vulgaris L. | ჯორთკუდა (jortk’uda) | Human Food - Phkhali, Human Food - Sats'ebai | Leaves | Forest |
| Bidens tripartida L. | ორკბილა (Orkbila); череда (Ch'ereda Russ.) | Human food | Fruit | Forest |
| Cichorium intybus L. | ხაპრაი (khap’arai), ტიტა (t'it's); ვარდკაჭაჭა (vardk’ach’ach’a Svan.), ხათალდიდნყ (khataldidinq' Ossetian) | Human Food - Sats'ebai; Human Food - Coffee replacement | Leaves; Root; Stem; Leaves, stem, buds | Forest |
| Cirsium incanum (S.G. Gmel.) Fisch. ex M. Bieb. | თეთრი ნარი (tetri nari), გლიხორხა (გლიხორხა), ნარა (nara) | Human Food - Phkhali | Leaves, stem | Forest, Garden |
| Cirsium sp. | ნარი (nari); (Shafalukh Arm) | Human Food - Sats'ebai | Leaves | Forest |
| Cirsium vulgare L. | ჩვეულებრივი ნარი (chveulebrivi nari), ქვაცხაცხი (ქვაცხაცხი) | Human Food - Honey (Bees) | Flower | Forest |
| Crepis sp. |  | Human Food - Phkhali | Leaves | Forest |
| Cynara cardunculus L. | ესაკანური არტიოკი (eskanuri artishoki) | Human food | Flower | Garden |
| Echinops sp. | თავკომბალა (tavk'ombala) | Human Food | Seeds | Forest |
| Eruca sativa Mill. | რუკულა (ruk'ula) | Human Food - Phkhali | Leaves | Garden |
| Helianthus annuus L. | მზესუმზირა (mzesumzira) | Human food | Seeds | Garden |
| Helianthus tuberosus L. | მიწავაშლა (mits'avashla), ხმატურა (khmat'ura), მიწის ვაშლი (mits'is vashli) | Human Food - Phkhali; Human food | Leaves; Roots | Garden |
| Lactuca sativa L. | მწვანე სალათა (Mtsvane salata), სალათა (salata), ბერტნძული სალატა (berdznuli salata), სალათის ფოთოლი (salatis potoli) | Human Food - Phkhali | Leaves | Garden |
| Lactuca sativa L. "greek" | მწვანე სალათა (Mtsvane salata) | Human Food - Phkhali | Leaves | Garden |
| Lactuca serriola L. | ხარნუყა (kharnuq’a) | Human Food - Phkhali, Human Food - Chave, Human Food - Sats'ebai | Leaves | Forest |
| Lactuca serriola L. | ღორის ქადა (ghoris qada), ნარკოკობა (nark'ok'oba), ჭინჭახა (ch'inch'akha); ხარნუყა (kharnuq’a Tush.); (rdzia-rdzia) | Human Food - Phkhali | Leaves, stem | Garden, Forest |
| Lapsana communis L. | ვაზისძირა (rdzia-rdzia); ფუჩფუჩა (puchpucha), ბურტყილა (burt'q'ila), პურტყელა (p'urt'q'ela) | Human Food - Phkhali | Leaves | Forest |
| Lapsana grandiflora M. Bieb | მწარე ხარნუყა (mts'are kharnuq'a) | Human Food - Phkhali | Leaves | Forest |
| Matricaria chamomilla L. | გვირილა (gvirila) | Human Food - Tea; Human Food - Chave | Whole plant; Leaves | Forest |
| Petasites albus (L.) Gaertn. | ბუერა (buera), დილმა (dilma), ბუურღუ (buurg'u) | Human Food - Phkhali | Leaves | Forest |
| Petasites vulgaris Desf. | ბუერა (buera), ბურღვა გურიაში (gurghvi guriashi), დიმელა (dimela); ბურღვილ (burghvil Svan.); ბარამბო (barambo Ajar.), ბურღვა (burghva (Gur.) | Human Food - Phkhali, Human Food - Chave; Human Food - Pickled | Leaves; Stem, leaves | Forest |
| Serratula quinquefolia Bieb. ex Willd. | საღვერავი (saghveravi), ირმისმხალა (irmismkhala), ნადირის ფხალი (nadiri pkhali), საფურცქვნელა (sapurtskvnela) | Human Food - Phkhali; Human Food - Pickled | Leaves, stem; Stem | Forest |
| Solidago canadensis L. | ყვავილწვრილა (q'vavilts'vrila) | Human Food | Flower | Forest |
| Sonchus asper (L.) Hill. | ღიჭა (ghich'a), ღენჭო (ghench'o) | Human Food - Phkhali | Leaves | Forest, Garden |
| Stevia sp. | სტევია (stevia) | Human Food - Sweetener | Leaves | Garden |
| Tagetes patula L. | ყვითელი ყვავილი (qhvitheli qhvavili), იმერული ზაფრანა (imeruli zaphrana), ზაფრანა (zaprana), ხავერდა (khaverda), იაყააქუ (yaq'aaku), ჭითაპირი (ch'itap'iri); გულყვითელა (gulqhvithela Svan.) | Human Food - Spice, Human Food - Svan salt | Flowers, Leaves | Garden, Forest |
| Taraxacum confusum Schischk. | საღვიძლა (saghvidzla); ბურბუშელა (Burbushela Tush.) | Human Food - Phkhali, Human Food - Chave | Leaves | Forest |
| Taraxacum officinale Wigg. | საღვიძლა საღვიძლა (saghvidzla), ბაბუაწვერა (babuats'vera), თუნთიშ ჭები (tuntish ch'ebi); ფანდურპაპაი (pandurpapai Tush.), საჯარაი (sajarai Svan.) | Human Food - Phkhali, Human Food - Chave, Human Food - Tea; Human Food - Sweetener; Human Food | Leaves, stem; Flower; Flower, root | Forest |
| Tragopogon sp. | ფამფარა (pampara); (Sindz Arm.) | Human food; Human Food - Pickled; Human Food - Phkhali | Root; Stem, Latex; Leaves | Forest, Garden |
| Tussilago farfara L. | ვირისტერფა (virist'erpa) | Human Food - Tea | Leaves | Forest |
| Xanthium strumarium L. | ღორის ბირკა (g'oris birk'a), ბირკა (birk'a) | Human Food - Phkhali | Leaves | Garden, Forest |
| **Auriculariaceae** |  |  |  |  |
| Auricularia auricula-judae (Bull.) Quél. | მურყანისოკო (murq’anisoko), გერდა (gerda) | Human food | Fruiting body | Forest |
| **Bankeraceae** |  |  |  |  |
| Hydnum repandum Fr. | ირმისტუჩა (iIrmist'ucha) | Human food | Fruiting body | Forest |
| Sarcodon imbricatus L. P. Karts. | ირემა სოკო (irema-so'ko) | Human food | Fruiting body | Forest |
| **Begoniaceae** |  |  |  |  |
| Begonia rex Putz. | ბეგონია (begonia), ბატიბუტი (bat'ibut'i) | Human Food | Seeds | Garden |
| **Berberidaceae** |  |  |  |  |
| Berberis vulgaris L. | კოწახური (k'ots'akhuri), მჟაუნა (mzhauna), მამჟაველა (mamzhavela), ჩვეულებრივი კოწახური (chveulebrivi k'ots'akhuri); გოცხილ (gotskhil Svan.), ესკალძმარა (esholtsmana Khev.) | Human food, Human Food - Spice; Human Food - Tkhemali, Human Food - Compote; Human Food - Phkhali | Fruit, root; Fruit; Leaves | Forest |
| **Betulaceae** |  |  |  |  |
| Alnus barbata C.A. Mey. | მურყანი (murq’ani); ბელყაც (belqhats Svan.) | Human Food - Tea | Leaves | Forest |
| Betula litwinowii Doluch. | არყი (arq'i) | Human food | Juice | Forest |
| Betula sp. | არყი (arq'i) | Human Food | Juice | Forest |
| Corylus avellana L. / C. pontica K. Koch. | თხილი (tkhili), ჩვეულებრივი თხილი (chveulebrivi tkhili), თხირი (თხირი); შდიხ (shdikh Svan.), (khaka Svan.), (nemsa (Svan.) | Human food; khaka Svan. | Fruit; Leaves | Garden, Forest |
| Corylus iberica L. | დათვითხილა (datvitkhila), დათვთხილა (datvtkhila) | Human Food | Fruit | Forest |
| Fagus orientalis Lipsky | წიფელი (ts'ipeli) | Human Food - Phkhali | Leaves | Forest |
| **Boletaceae** |  |  |  |  |
| Boletus edulis Bull. | დათიკა სოკო (datik'a sok'o), [დათვის სოკო (datvis soko), ძირბუკა (dzirbuk'a), დათვა სოკო (datva sok'o) | Human food | Fruiting body | Forest |
| Boletus erythropus Pers. | წითელფეხა (ts'itelpekha), ხუშხუშა (khushkhusha) | Human food | Fruiting body | Forest |
| Leccinum scabrum (Bull.) Gray | დედაბერა (dedabera) | Human Food | Fruiting body | Forest |
| **Boraginaceae** |  |  |  |  |
| Myosotis sp. | კესანე (k'esane), კურდღლის საკნატუნო (კურდღლის საკნატუნო), თიკნისყურა (თიკნისყურა) | Human Food - Phkhali | Leaves, stem | Forest |
| Symphytum grandiflorum DC. | ლაშქარა (lashkara), კარსჰავა (karshava), სარო (saro) | Human Food - Phkhali | Leaves, stem | Forest |
| Trachystemon orientalis (L.) G. Don | ანჩხლა (anchkhla), ბატკნისყურა (bat'k'nisq'ura), ერბოვანა (erbovana) | Human Food - Phkhali, Human Food - Khachapuri | Leaves | Forest, Garden |
| **Brassicaceae** |  |  |  |  |
| Armoracia rusticana (G. Gaertn.) B. Mey. & Scherb. | პირშუშხა (p’irshushkha); ხრენი (khreni) | Human food; Human Food - Phkhali | Root; Leaves | Garden |
| Brassica campestris L. | შალგი (shalgi); გიერა (giera Tush.) | Human Food - Phkhali | Leaves | Forest |
| Brassica campestris L. ssp. oleifera DC. | შალგი (shalgi); გიერა (giera Tush.) | Human Food - Phkhali, Human Food - Sats'ebai, Human Food - Pickled; Human food | Leaves; Stem | Forest |
| Brassica juncea (L.) Czern. | სარეპტის მდოგვი (sarep't'is mdogvi), დონგი (dongi) | Human Food - Phkhali | Leaves | Garden |
| Brassica montana Pourr. | კოლრაბი (k'olrabi), ხვიტი (khvit'i), კეჟერა ფხალი (k'ezhera pkhali), კეჟერა ფხალი (k'ezhera pkhali), ხული (khuli) | Human Food - Phkhali | Leaves | Garden |
| Brassica oleracea L. | კომბოსტო (k'ombost'o), კეჟერა ფხალი (k'ezhera pkhali), კეჟერა (k'ezhera); ლახანა (lachana Svan.) | Human Food - Phkhali, Human food, Human Food - Pickled | Leaves | Garden, Forest |
| Brassica oleracea L. red | ლურჯი კომბოსტო (lurji k'ombost'o) | Human Food - Phkhali | Leaves | Garden |
| Brassica oleracea L. var. botrytis | ყვავილოვანი კომბოსტო (q'vavilovani k'ombost'o) | Human food; Human Food - Phkhali | Flower; Leaves | Garden |
| Brassica oleracea L. var. gemmifera Brussles Sprouts | ბრიუსელის კომბოსტო (briuselis k'ombost'o) | Human Food - Phkhali | Leaves | Garden |
| Brassica oleracea L. var. gongylodes | კოლრაბი (k'olrabi), შავი ფხალი (shavi pkhali), ხვიტი (khvit'i), კეჟერა ფხალი (k'ezhera pkhali), ხული (khuli) | Human food; Human Food - Phkhali | Leaves, stem, root; Leaves | Garden |
| Brassica oleracea L. var. Italica | კომბოსტო (k'ombost'o), ბროკოლი (brok'oli) | Human Food, Human Food - Phkhali, Human Food - Pickled | Leaves Flower | Garden |
| Brassica rapa L. subsp. rapifera Metzger | თალგამი (thalgami), ბოლოკი (bolok'i); ქართ (quarth Svan.), მიწიჩალა (mitsichala Imer.) | Human food; Human Food - Pickled; Human Food - Phkhali | Root; Leaves | Garden |
| Brassica rapa var. rapa L. | თალგამურა (thalgamura) | Human food | Root, seeds | Garden |
| Bunias orientalis L. | ხატოტი (Khat'ot'i), ხოხნუტა (khotchadi),ტიტა (t'it'a); ხოხნუტა (Khokhnuta Khev.) | Human Food - Phkhali; Human food | Leaves; Flower, leaves, stem | Forest |
| Capsella bursa-pastoris L. | ხავარტა (khavart’a), ხარკბილა (kharik'bila), წიწმატურა (ts'ts'mat'ura), ოდელია (odelia), რეკებოს (rek'ebos); ხწ (khts' ossetian) | Human Food - Phkhali | Leaves, stem | Forest |
| Cardamine hirsuta L. | ტყის წიწმატი (t'q'is ts'its'mat'i) | Human Food - Phkhali | Leaves, stem | Forest |
| Cheiranthus cheiri L. | შაბუ (shabu) | Human Food - Phkhali | Leaves | Forest |
| Lepidium sativum L. | წიწმატი (ts'its'mat'i) | Human Food - Phkhali, Human Food | Leaves | Garden |
| Raphanus raphanistrum subsp. sativus (L.) Domin | თვის ბოლოკი (tvis bolok'i), რედისკა (redisk'a), თალგამი (talgami), შავი ბოლოკი (shavi boloki), მიწისმხალა (mits'imxala) | Human Food; Human Food - Phkhali | Root; Leaves | Garden |
| Raphinastrum rugosum L. All. | ბოლოკა (bolok'a), შალგი (shalgi), ბოლოკას კოტი (bolok'as k'ot'i) | Human Food - Phkhali; Human Food | Stem, leaves; Root | Forest, Garden |
| Sinapis arvensis L. | მინდვრის მდოგვი (mindvris mdogvi), შალგი (shalgi), მდოგვი (modogvi); გიერა (giera Tush) | Human Food - Phkhali, Human Food - Pickled | Leaves | Garden |
| **Campanulaceae** |  |  |  |  |
| Campanula alliariifolia Wild. | ბუსკანტურა (busk'ant'ura), სკვანტილა (sk'vant'ila) | Human Food - Phkhali | Leaves | Forest |
| Campanula biebersteiniana Roem. & Schult. | ქარცხვი (kartskhvi) | Human food | Flower | Forest |
| Campanula glomerata L. | დილხამი (dilkhami), ჭარბადელო (ch'arbadelo) | Human food, Human Food - Phkhali | Leaves, stem | Forest |
| Campanula lactiflora M. Bieb. | კიცძიშლ (kitsdzishl), დონდოლა (dondola), ალოშა (alosha), დონდოლო (dondola), საფურცქვნელა (sapurtskvnela), მუყუდო (muq'udo); კენკეშა (k'enk'esha Khev.), ქიც (kits Svan.) | Human Food - Phkhali; Human food, Human Food - Khachapuri, Human Food - Sats'ebai | Leaves, stem; Stem | Forest |
| Campanula rapunculoides L. | მიჩიგტარაი (michigt’arai), მაჩიტა (machit'a), ჩიტითავა (chit'itava); მაჩიკა (machika Khev.) | Human Food - Sats'ebai; Human food; Human Food - Phkhali | Leaves; Root; Leaves, stem | Forest |
| **Cannabaceae** |  |  |  |  |
| Cannabis sativa L. | კანაფი (k'anapi), ქან (qan), ქანა (kana) | Human Food, Human Food - Svan salt, Human Food - Khachapuri, Human Food - Oil | Seeds | Garden, Forest |
| Humulus lupulus L. | სვია (svia), სვე (sve) | Human Food, Human Food - Beer; Human Food - Phkhali; Human Food - Beer | Flower; Leaves, stem | Forest, Garden |
| **Cantharellaceae** |  |  |  |  |
| Cantharellus cibarius Fr. | მიქლიო (kikilo); მიქუელა (miquela Svan.) | Human food | Fruiting body | Forest |
| **Caprifoliaceae** |  |  |  |  |
| Lonicera caucasica Pall. | წერწა (ts'erts'a); ჭიჭკოტი (ch’ich’k’ot’i Tush.) | Human food | Fruit | Forest |
| **Caryophyllaceae** |  |  |  |  |
| Melandrium balansae Boiss. | ვირთბატრა (virtbat’ra ), სასტვენა (tsik’niq’ura), სასტვენა (sast'vena); ბალანსა (balansa Khev.) | Human Food - Phkhali | Leaves | Forest |
| Melandrium sp. | სასტვენა (sast'vena), სასტვენა (tsik’niq’ura) | Human Food - Phkhali | Leaves, stem | Forest |
| Oberna wallichiana (Klotzsch) Ikonn. | ჭრიჭინა (ch'ritchina), ჭყიპანტა (ch'q'ip'ant'a), მჭივანა (mch'ivana) | Human Food - Phkhlovana | Leaves | Forest |
| Silene lacera Steven | ქვიშამხალი (kvisha pkhali Tush.) | Human Food - Phkhali; Human food | Leaves; Seeds | Forest, Garden |
| Silene sibirica L. Pers. | ოლენა (olena) | Human Food - Pickled | Leaves, stem | Forest |
| Silene wallachiana Klotzsch | მზივანა (mch'ivana), სატკეცელა (sat'ketsela) | Human Food - Phkhali; Human Food | Leaves; Stem | Forest, Garden |
| Stellaria media (L.) Vill. | ჟუნჟრუკი | Human Food - Khachapuri | Leaves | Forest |
| **Clavariadelphaceae** |  |  |  |  |
| Clavariadelphus pistillaris (L.) Donk | მინდურისია (mindurisia) | Human food | Fruiting body | Forest |
| **Convolvulaceae** |  |  |  |  |
| Convolvulus arvensis L. | ხვართქლა (khvartkla), გამბულა ბალაცი (gambula balakhi), პატალა (p'atala) | Human Food - Phkhali | Leaves, stem | Garden |
| **Cornaceae** |  |  |  |  |
| Cornus mas L. | შვინდი (shvindi), შინდი (shindi), შულდი (shuldi), ბძგირი (bdzgiri); შემ (shem Ossetian) | Human food, Human Food - Jam, Human Food - Juice, Human Food - Compote | Fruit | Garden, Forest |
| Swida australis (C.A. Mey.) Pojark ex Grossh. | შინდანწლა (shindants'la) | Human Food - Phkhali | Leaves, stem | Forest, Garden |
| **Cortinariaceae** |  |  |  |  |
| Cortinarius violaceus (L.) Fr. Gray | ლურჯკაბა (lurjk'aba) | Human food | Fruiting body | Forest |
| **Crassulaceae** |  |  |  |  |
| Sedum caucasicum Boriss. | კლდის დუმა (k’ldisduma Tush.) | Human food, Human Food - Phkhali | Leaves | Forest |
| Sedum stoloniferum Gmel. | მსუქანა (msukana) | Human Food - Phkhali | Leaves, stem | Forest |
| Sempervivum caucasicum Rupr. ex Boiss. | კლდისვაშლა (pkhija ), ჯორისკუდა (jorisk’uda); (კლდის დუმა (k’ldisduma Tush.) | Human Food - Phkhali | Leaves | Forest |
| **Cucurbitaceae** |  |  |  |  |
| Bryonia dioica Jacq. | ლეშურა (leshura) | Human Food - Phkhali | Leaves | Forest |
| Citrullus lanatus (Thunb.) Matsum. & Nakai | საზამთრო (sazamthro ), ჩვეულებრივი საზამთრო (chveulebrivi sazamtro) | Human food, Human Food - Pickled | Fruit | Garden |
| Cucumis melo L. | ნესვი (nesvi) | Human food | Fruit | Garden |
| Cucumis sativus L. | კიტრი (k'it'ri), პიკული კიტრი (p'il'uyli k'it'ri), კინტირი (k'int'iri) | Human food, Human Food - Salad; Human Food - Pickled, Human Food - Dye for pickles | Fruit, flower; Fruit | Garden |
| Cucurbita maxima L. | ქესტანა (kest'ana), მსხვილი გოგრა (mskhvili gogra) | Human food | Fruit | Garden |
| Cucurbita pepo L. | გოგრა (gogra), ხაპერა (khap'era), ხაპი (khap'i), ბამბის ხაპი (bambis khap'i),კოშიე ხაპი (k'oshie khap'i), ქესტანა (khap'era), მწარე ხაპა (mts'are khap'a, თათრული კვახი (tartuli k'vakhi), ხოკერა კვახი (khok'era k'vakhi) ,უკანო კვახი (uk'ano k'vakhi), წაბლა ხაპი (ts'abla khap'i), ხოკერა გოგრა (khok'era gogra), კოპეშია (k'op'eshia); კობეშია (kobeshia Svan.), კვახი (kvakhi Svan.) | Human food; Human Food - Pickled; Human Food - Phkhali | Fruit, seeds; Fruit; Leaves | Garden |
| Cucurbita pepo L. var. giromontia | ყაბაყი (q'abaq'i) | Human food | Fruit, flower; Fruit | Garden |
| Cucurbita pepo L. var. patisson | გოგრა (gogra), ყაბაყი პატისონი (q'abaq'i p'atisoni) | Human food | Fruit | Garden |
| Cucurbita sp. | ხაპი (khap'i), წაბლა ხაპი (ts'abla khap'i) | Human Food | Fruit | Garden |
| Lagenaria siceraria (Molina) Standl. | მწარე კვახი (mts'are k'vakhi) | Human food | Fruit | Garden |
| Cucurbita sp. | გოგრა (gogra), ყაბაყი (q'abaq'i) | Human Food | Fruit | Garden |
| **Cupressaceae** |  |  |  |  |
| Junperus sabina L. | ჭყერო (tchqhero Svan.) | Human food | Stem, root | Forest |
| **Dipsacaceae** |  |  |  |  |
| Cephalaria gigantea (Ledeb.) Bobrov | სკიპალო (sk'ip'alo) | Human food | Stem | Forest |
| **Dryopteridaceae** |  |  |  |  |
| Dryopteris filix-mas (L.) Schott. | ჩადუნა (chaduna); ჩადა (chada Svan.), გვრიმბ (gvrimb Svan.) | Human Food - Phkhali | Leaves | Forest |
| **Ebenaceae** |  |  |  |  |
| Diospyros lotus L. | ხურმა (khurma), ჩვეულებრივი ხურმა (chveulebrivi khurma), კარალიოკი (k'araliok'i), იაპონური ხურმა (iap'onuri khurma), მარსინაია (marsinaia) | Human food | Fruit | Garden, Forest |
| Diospyros sp. | ხურმა (khurma), ალიაღა (aliag'a) | Human Food | Fruit | Garden |
| Diospyros virginiana L. | ვირგინიული ხურმა (virginiuli khurma), ხურმა (khurma) | Human Food | Fruit | Garden |
| **Elaeagnaceae** |  |  |  |  |
| Elaeagnus sp. | ფშატი (pshati) | Human Food | Fruit | Forest |
| Hippophaë rhamnoides L. | ქაცვი (katsvi), აპლეპიხა (ap'lep'ikha) | Human Food | Fruit | Forest |
| Shepherdia argentea Nutt. |  | Human Food - Phkhali | Leaves | Garden |
| Shepherdia sp. |  | Human Food | Fruit | Forest |
| **Ericaceae** |  |  |  |  |
| Empetrum hermaphroditum Hagerup | კეწერა (k'ets'era) | Human food; Human Food - Phkhali | Fruit; Leaves | Forest |
| Oxycoccus quadripetalus Gilib. | შტოში (shtoshi) | Human food | Fruit | Forest |
| Vaccinium arctostaphylos L. | მოცვი მაღალი (motsvi maghali), მაღალი მოცვი (mag'ali motsvi), მოცვი (motsvi), ლუდი მოცვი (ludi motsvi), მელიშია (melishia), დატვის მოცვი (datvis motsvi); ცინყა (tsinqha Svan.), მეგმულდ (megmuld Svan.) | Human food, Human Food - Alcohol, Human Food - Jam, Human Food - Compote, Human Food - Wine; Human Food - Tea, Human Food - Beer, Human Food - Phkhali | Fruit; Leaves | Forest |
| Vaccinium myrtillus L. | მოცვი (motsvi), მთის მოცვი (mtis motsvi), მოდგინარი (modginari), ბაღის მარწყვი (bag'is marts'q'vi), (shlishavi, tselisp'ira), მინდორიში მელიშია (mindorishi melishia), ; ჟოლი (zholi Tush.), იღვი (ighvi Svan.), მეგმულდ (megmuld Svan.), შელშავი (shelshavi Khev.), წითელმოჩა (ts'itelmochi Khev.), მეგმულდ (megmuld Svan.) | Human food, Human Food - Jam,Human Food - Compote; Human Food - Tea, Human Food - Phkhali | Fruit; Leaves | Forest |
| Vaccinium sp. | მოცვი (motsvi), მელიშია (melishia) | Human Food | Fruit | Forest |
| Vaccinium uliginosum L. | ლურჯი მოცვი (lurji motsvi) | Human Food | Fruit | Garden |
| Vaccinium vitis-idaea L. | წითელი მოცვი (ts’iteli motsvi); სტომი (stomi Tush.), ვიღვი (vighv Svan.), მაიოლ / მაია (maiol / maia Svan.), წითელმოჩა (tsitelimocha Tush.) | Human food; Human Food - Tea | Fruit; Leaves, branches | Forest |
| **Euphorbiaceae** |  |  |  |  |
| Aleurites moluccanus L. Willd. | ლუმბინგი (lumbingi) | Human Food - Oil | Fruit | Garden |
| **Fabaceae** |  |  |  |  |
| Astragalus caucasisus Pall. | გლერძი (glerdzi) | Human Food - Tea | Leaves | Forest |
| Cicer arietinum L. | მუხუდო (mukhudo) | Human food | Seeds | Garden |
| Coronilla varia L. | ყვავისფრჩხილა (q'vavisprchkhila) | Human Food - Khachapuri | Leaves | Forest |
| Galega orientalis Lam. | ხბოშუბლა (khboshubla) | Human Food - Pickled; Human Food - Phkhali | Stem; Leaves | Forest |
| Glycine max (L.) Merr. | მუხუდო | Human food | Seeds | Garden |
| Glycine max (L.) Merr. | სონა (soia), იაპონია (iap'onia); სოიო (soio Svan.) | Human Food - Phkhali | Leaves | Garden |
| Glycyrrhiza glabra L. | ძირტკბილა (dzirt’k’bila) | Human Food - Sweetener | Root | Forest |
| Lathyrus roseus Steven | ვაზისძირა (vazisdzira); არჯაკელი (arjak'eli Tush.), ზერჩო (zercho Svan.) | Human Food - Phkhali | Leaves, stem | Forest |
| Lathyrus tuberosus L. | თერო (tero) | Human Food | Tuber | Forest |
| Lens cornicularis L. | ოსპი (ospi); ქირს (qirs. Svan.) | Human food | Seeds | Garden |
| Phaseolus sativus L. | ლობიო (lobio), ჩვეულებრივი ლობიო (chveulebrivi lobio), ძირის ლობიო (dziris lobio), ლებია (lebia) | Human food | Fruit, seeds | Garden |
| Pisum sativum L. | მუხუდო (mukhudo), ბარდა (barda), მინდვრის ბარდა (mindvris barda), ცერცვი (tsertsvi); ღედაარ (ghedaar Svan.), ისაბ (isab Svan.) | Human food | Seeds | Garden |
| Robinia pseudoacacia L. | აკაცია (ak'atsia), ცრუაკაცია (tsruak'atsia), ეკლის ხე (ek'lis khe) | Human Food - Honey (Bees), Human Food; Human Food - Pickled | Flower; Stem young | Forest, Garden |
| Thymus colinus Bieb. | ქონდარი (kondari) | Human Food - Tea | Leaves | Forest |
| Trifolium sp. | სამყურა (samq'ura) | Human Food - Phkhali; Human Food - Honey (Bees) | Leaves; Flower | Forest |
| Trigonella caerulea (L.) Ser. | შამბრიკა (shambrika), ულუმბო (ulumbo); უცხო სუნელი (utskho suneli Svan.) | Human food, Human Food - Svan salt, Human Food - Spice; Human Food - Phkhali | Seeds; Leaves | Garden |
| Vicia faba L. | ცერცვი (tsertsvi); როგი (rogv Svan.) | Human food | Seeds | Garden |
| Vicia sativa L. | ჭეკუნტელაი (ch’ek’unt’elai) | Human Food - Sats'ebai | Leaves | Garden |
| Vigna angularis (Willd.) Ohwi & H. Ohashi | აზუკი (azuk'i), საკადრისა (sak'adrisa) | Human food | Seeds | Garden |
| **Fagaceae** |  |  |  |  |
| Castanea sativa Mill. | წაბლი (ts'abli); წაბლა (ts'abla), ჭიფერ (ch'iper), ჩვეულებრივი წაბლი (chveulebrivi ts'abli), ჭუბური (ch'uburi) | Human food; Human Food - Phkhali | Seeds; Leaves | Forest, Garden |
| Fagus orientalis Lipsky | წიფელი (ts'ipeli); წიფელა (ts'ipela), აღმოსავლური წიფელი (ag'mosavluri ts'ipeli); თარსი ბალოს (tarsi-balos Ossetian) | Human food; Human Food - Phkhali | Seeds; Leaves | Forest |
| Quercus iberica M. Bieb. | მუხა (mukha), ნილე (nile), ქართული მუხა (kartuli mukha) | Human Food | Fruit | Forest |
| **Fistulinaceae** |  |  |  |  |
| Fistulina hepatica (Schaeff.) With. | გვიძლა (gvidzla) | Human Food | fruiting body | Forest |
| **Fungi indet.** |  |  |  |  |
|  | (g'uni nichv) | Human Food | Fruiting body | Forest |
|  | (kojoba) | Human Food | Fruiting body | Forest |
|  | (tetrisokho) | Human Food | Fruiting body | Forest |
|  | (tetrisokho) | Human Food | Fruiting body | Forest |
|  | (tvana sokho) | Human Food | Fruiting body | Forest |
|  | Родственница (Rostvennitsa Russ.) | Human Food | Fruiting body | Forest |
|  | არჩექალი (archekali Khev.) | Human Food - Pickled | Fruiting body | Forest |
|  | ბუხმისოხო (bukhmisoko) | Human Food | Fruiting body | Forest |
|  | გიგოჭარჩა (gigocharcha) | Human Food | Fruiting body | Forest |
|  | ვიტელი (viteli) | Human Food | Fruiting body | Forest |
|  | თალიჩა (talicha) | Human Food | Fruiting body | Forest |
|  | თაში (tashi) | Human Food | Fruiting body | Forest |
|  | თელასოკო (thelasoko) | Human Food | Fruiting body | Forest |
|  | თვინინელი (tvinineli) | Human Food | Fruiting body | Forest |
|  | თიანასოკო (tianasoko) | Human Food | Fruiting body | Forest |
|  | თიასოკო (triasoko) | Human Food | Fruiting body | Forest |
|  | თიკნიყურა (tik'niq'ura) | Human Food | Fruiting body | Forest |
|  | თიორული (tioruli) | Human Food | Fruiting body | Forest |
|  | თშადასოხო (tshadasoko) | Human Food | Fruiting body | Garden |
|  | ირალა (tsirala) | Human Food | Fruiting body | Forest |
|  | ირტელისოხო (tsirtselisoko) | Human Food | Fruiting body | Forest |
|  | კეკელა (kekela) | Human Food | Fruiting body | Forest |
|  | კრუსე (kruse) | Human Food | Fruiting body | Forest |
|  | კურილაზკატუმო (kurilakatumo) | Human Food | Fruiting body | Forest |
|  | ლარგი (largi) | Human Food | Fruiting body | Forest |
|  | მანსიტო (mansito) | Human Food | Fruiting body | Forest |
|  | მარნულა (marnula) | Human Food | Fruiting body | Forest |
|  | მატსუკალა (matsukala) | Human Food | Fruiting body | Forest |
|  | მილიგაუმაჩი (miligaumachi) | Human Food | Fruiting body | Forest |
|  | მიტისოკო (mitisoko) | Human Food | Fruiting body | Forest |
|  | მიწის კალმახი (mits'is k'almakhi) | Human Food | Fruiting body | Forest |
|  | მუსლიანკა (masilanka) | Human Food | Fruiting body | Forest |
|  | მწარია (mts'aria) | Human Food | Fruiting body | Forest |
|  | ნიჯული (nijuli) | Human Food | Fruiting body | Forest |
|  | პილპილა (p'ilp'ila) | Human Food | Fruiting body | Forest |
|  | საყლავა (saq'lava) | Human Food | Fruiting body | Forest |
|  | საყლავა (saq'lava) | Human Food | Fruiting body | Forest |
|  | სერანა (serana) | Human Food | Fruiting body | Forest |
|  | სერჭა (sercha) | Human Food | Fruiting body | Forest |
|  | ფიჭვა სოკო (pich'vasok'o ) | Human Food | Fruiting body | Forest |
|  | ქამა (kama) | Human Food | Fruiting body | Forest |
|  | შანცკავა (shantskava) | Human Food | Fruiting body | Forest |
|  | ცვილისოხო (tsvilisoko) | Human Food | Fruiting body | Forest |
|  | ციპჰელა (tsiphela) | Human Food | Fruiting body | Forest |
|  | ცხვარა (tskhvara) | Human Food | Fruiting body | Forest |
|  | წაპლისოკო (tsaplikosoko) | Human Food | Fruiting body | Forest |
|  | წიანასოკო (tsianasoko) | Human Food | Fruiting body | Forest |
|  | ჭრელკაბა (ch'relk'aba) | Human Food | Fruiting body | Forest |
|  | ხეთამხალი (khetamkhali) | Human Food | Fruiting body | Forest |
| **Gentianaceae** |  |  |  |  |
| Swertia iberica Fisch & C.A. Mey. | გაბლუარაი (gabluarai) | Human Food - Chave | Leaves | Forest |
| **Geraniaceae** |  |  |  |  |
| Erodium cicutarium (L.) L'Hér. ex Aiton | სავარცხელა (savartskhela); ბატიფეხა (bat'ipekha) | Human Food - Phkhali | Leaves, stem | Forest |
| Geranium robertianum L. | ნემსიწვერა (nemsits'vera) | Human Food - Phkhali | Leaves | Forest |
| Geranium sp. | ნემსიწვერა (nemsits'vera), ოქროსბეჭედა (okrosbech'eda) | Human Food - Phkhali | Leaves, stem | Forest |
| **Gomphaceae** |  |  |  |  |
| Ramaria flava (Schaeff.) Quél. | ირმის რქა (irmis rka); საჩიჩელა (sachichela Svan.) | Human food | Fruiting body | Forest |
| **Grossulariaceae** |  |  |  |  |
| Grossularia reclinata (L.) Mill. | ხურტკმელი (khurt’k’meli) | Human food | Fruit | Garden, Forest |
| Ribes biebersteinii Berl. ex DC | მოცხარი (motskhari); მენცხვარი (mantskhald Svan.), ხუნწი (khunts'i Tush.) | Human food; Human Food - Tea | Fruit; Leaves | Forest |
| Ribes grossularia L. | ოფლეენდ (ophleend Svan.) | Human food | Fruit | Garden, Forest |
| Ribes nigrum L. | მოცხარი (motskhari), შავი მოცხარი (shavi motskhari) | Human food, Human Food - Jam | Fruit | Garden, Forest |
| Ribes orientale Desf. | ალუდა (aluda) | Human food | Fruit | Forest |
| Ribes rubrum L. | მოცხარი (motskhari), წითელი მოცხარი (ts’iteli motskhari), ალუდა (aluda), ჩვეულებრივი მოცხარი (chveulebrivi motskhari), მერცხალა (mertskhala),მთის ყურძენი (mtis q'urdzeni), ჩხარაზი (chkharazi) | Human food; Human Food - Phkhali, Human Food - Compote | Fruit; Leaves | Garden, Forest |
| Ribes sp. | მოცხარი (motskhari), სმაროდინა (smarodina); ხუნწი (khunts'i Tush.) | Human food, სმაროდინა | Fruit | Garden, Forest |
| Ribes uva-crispa L. | ხურტკმელი (khurt'k'meli), (k'rizhonik'i); ოფლანდ (ophleend Svan.) | Human food | Fruit | Garden, Forest |
| **Guttiferae** |  |  |  |  |
| Hypericum perforatum L. | კრაზანა (k’razana) | Human Food - Tea; Human Food - Beer | Flower, leaves; Flower | Forest, Garden |
| **Hericiaceae** |  |  |  |  |
| Hericium erinaceus Bull. Pers. | ეშმაკის ბურნუთი (eshmak'is burnuti); გუდასოკო (gulasoko Tush.) | Human food | Fruiting body | Forest |
| **Hyacinthaceae** |  |  |  |  |
| Ornithogalum spp. | ძაღლნიორა (dzaghlniora), ჩიტისთავა (chit'istava) | Human Food - Phkhali | Whole plant | Forest |
| Scilla siberica Andrews | ჩიტისთვალა (chit'istava), ჭუტია ფხალი (ch'ut'ia pkhali), ნიგვზისძირა (nigvzisdzira) | Human food, Human Food - Phkhali | Leaves, stem | Forest |
| **Indet.** |  |  |  |  |
|  | აქარა (acara) | Human food | Fruit | Garden |
|  | ბრასიზ (brasidz) | Human food | Fruit | Garden |
|  | წაჰუი (ts'ahui) | Human food | Fruit | Garden |
|  | დედოფალა (dedophala Svan.) | Human food | Fruit | Forest |
|  | ვირდუცა (virdutsa Khev.) | Human Food - Pickled | Stem | Forest |
|  | ზესტრულა (zestrula Khev.) | Human Food - Phkhali | Leaves | Forest |
|  | ნესგვლა (nesgvla Svan.) | Human Food - Phkhali | Leaves | Forest |
|  | ცუჟლა (tzushla Svan.) | Human Food - Phkhali | Leaves | Forest |
|  | ჯოჩოლა (jochola Khev.) | Human Food - Phkhali | Leaves | Forest |
|  | ჰაინერ (hainer Svan.) | Human Food - Phkhali | Leaves | Forest |
|  | (Achali Arm.) | Human food | Fruit | Forest |
|  | (Tatjanura Arm.) | Human Food - Pickled | Stem | Forest |
|  | (Teterjik Arm.) | Human food | Fruit | Forest |
|  | (Uremi Arm.) | Human food | Stem | Forest |
|  | (Vertshik Arm.) | Human food | Fruit | Forest |
|  | ჭარეში (ch'areshi) | Human Food - Phkhali | Leaves | Forest |
|  | თვილი (tvili) | Human food | Fruit | Forest |
|  | ბარიშინდი (barishindi) | Human food | Fruit | Garden |
|  | კაკია (k'ak'ia) | Human Food - Phkhali | Leaves, stem | Forest |
|  | კარეული ჩიჩმატი (kareuli chichmati) | Human food | Fruit | Forest |
|  | მიციჩალა (mitsichala) | Human food | Fruit | Garden |
|  | მწვანე მაღვალი (mtsvane maghvali) | Human Food - Phkhali | Leaves | Garden |
|  | ნეგოშალი (negoshali) | Human Food - Phkhali | Leaves | Forest |
|  | საკრანა (sakrana) | Human Food - Phkhali | Leaves | Garden |
|  | სოდიტზ (soditz) | Human Food - Phkhali | Leaves | Forest |
|  | ფთაშეჭრილა (prtashech'rila), მინდვრის ფხალი (mindvris pkhali) | Human Food - Phkhali | Leaves, stem | Forest |
|  | ჩაილოვა (ch'ailova) | Human Food - Khachapuri | Leaves | Forest |
|  | ჭერანი (ch'erani) | Human food | Fruit | Garden |
|  | ხოტშილავშა (khotshlivasha) | Human Food - Khachapuri | Leaves | Forest |
|  | (Muraba Russ.) | Human food | Fruit | Forest |
